# Supplementary material for: Microbial Community Successional Changes in a Full-Scale Mesophilic Anaerobic Digester from the Start-Up to the Steady-State Conditions
Source: MDPI journal article supplement (doi:10.3390/microorganisms9122581), 2021-12-13
Supplement: s1 [file s1]

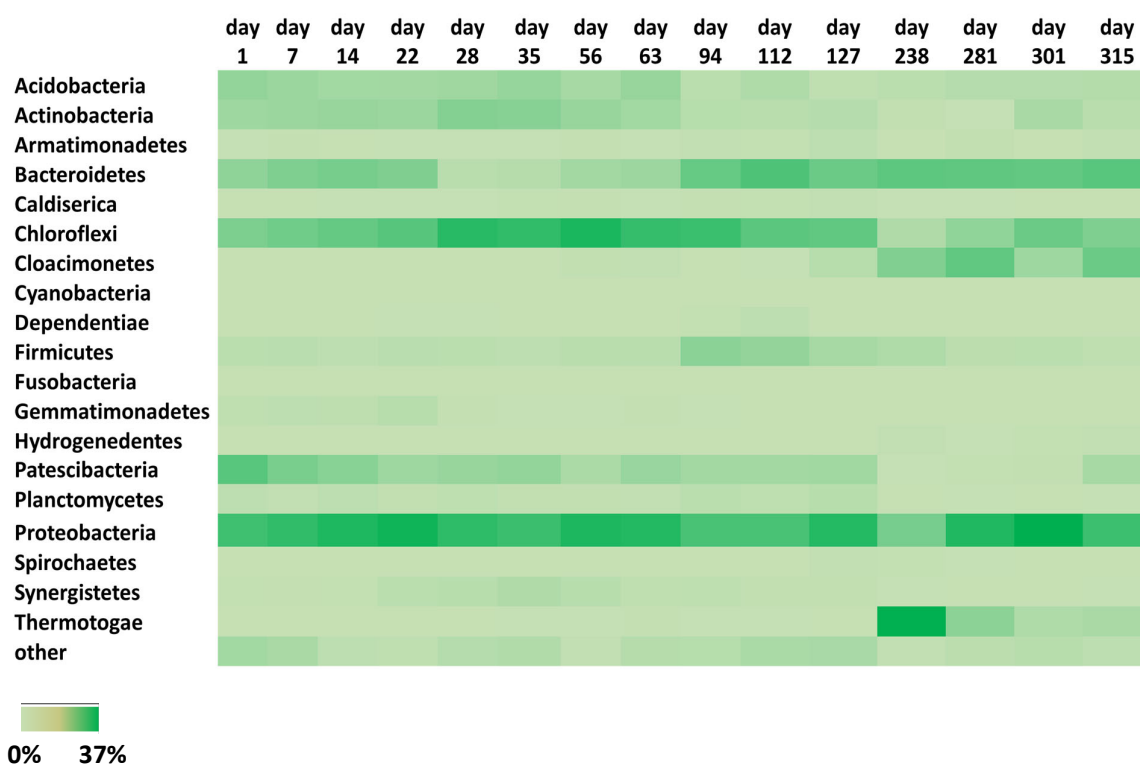

**Figure S1.** Frequency heat-map of bacteria communities at taxonomical phylum levels during digester operation. The colour intensity shows the relative abundance of the different groups.

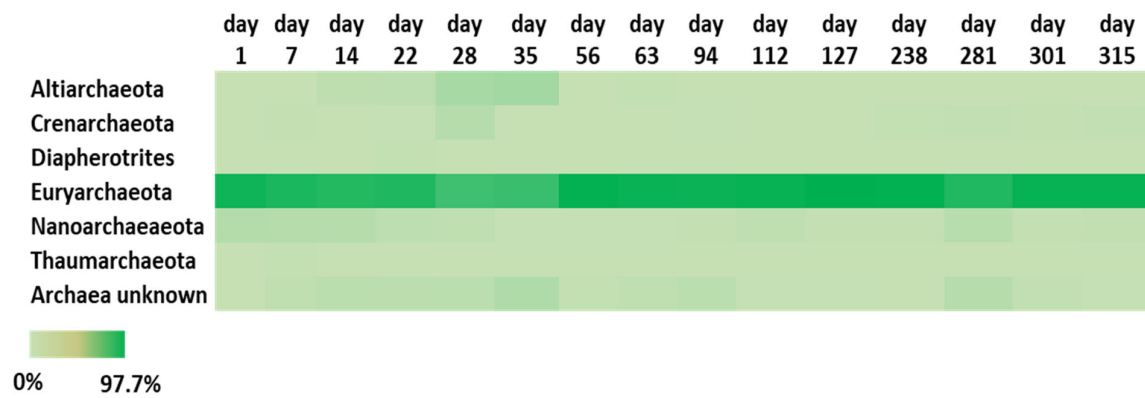

**Figure S2.** Frequency heat-map of archaeal communities at taxonomical phylum levels during digester operation. The colour intensity shows the relative abundance of the different groups.
